# Supplementary material for: Systematic review and meta-analysis of neurofeedback and its effect on posttraumatic stress disorder
Source: Frontiers journal article supplement (doi:10.3389/fpsyt.2024.1323485), 2024-03-21
Supplement: Data_Sheet_5.pdf [file Data_Sheet_5.pdf]

| Appendix 5: Sensitivity and statistical power - sample size required for Cohen's d effect size |                      |                                                                |                                                                           |       |                                                            |                     |                         |                                                                                       |
|------------------------------------------------------------------------------------------------|----------------------|----------------------------------------------------------------|---------------------------------------------------------------------------|-------|------------------------------------------------------------|---------------------|-------------------------|---------------------------------------------------------------------------------------|
| Use of G Power 3.1.9.7 to calculate sample sizes based on Cohen's d                            |                      |                                                                |                                                                           |       |                                                            |                     |                         |                                                                                       |
| Study                                                                                          | Sample size in trial | Test applied                                                   | Power @ 80% to detect Cohen's d effect size - number of patients required |       | Sample size based on power calc as identified in the study | Power used in study | Cohen's d used in study | Notes                                                                                 |
|                                                                                                | N                    |                                                                | 0.5                                                                       | 0.8   |                                                            |                     |                         |                                                                                       |
| Peniston 1991                                                                                  | 29                   | Chi Square                                                     | 96                                                                        | 38    | N/A                                                        |                     |                         |                                                                                       |
| Kelson 2013                                                                                    | 10                   | Mann Whitney U                                                 | 134                                                                       | 54    | N/A                                                        |                     |                         |                                                                                       |
| Yeganeh 2015                                                                                   | 30                   | ANCOVA                                                         | 116                                                                       | 54    | 30                                                         | 0.76                | 0.5                     |                                                                                       |
| van der Kolk 2016                                                                              | 52                   | ANCOVA                                                         | 150                                                                       | 71    | N/A                                                        | 0.77                | 0.8                     | post hoc power                                                                        |
| Onton 2016                                                                                     | 72                   | Unclear                                                        |                                                                           |       | N/A                                                        |                     |                         |                                                                                       |
| Noohi 2017                                                                                     | 30                   | ANCOVA                                                         | 116                                                                       | 54    | N/A                                                        |                     |                         |                                                                                       |
| Misaki 2018                                                                                    | 36                   | ANCOVA                                                         | 126                                                                       | 59    | N/A                                                        |                     |                         |                                                                                       |
| Antle 2019                                                                                     | 21                   | 2X3 mixed ANOVA                                                | 98                                                                        | 46    | N/A                                                        |                     |                         |                                                                                       |
| Bell 2019                                                                                      | 23                   | nonparametric signed rank Wilcoxon and Mann Whitney U analyses | 134                                                                       | 54    | 23                                                         |                     | 0.2, 0.5, 0.8           |                                                                                       |
| Nicholson 2020                                                                                 | 38                   | independent sample t test                                      | 128                                                                       | 52    | N/A                                                        |                     |                         |                                                                                       |
| Rogel 2020                                                                                     | 37                   | ANOVA                                                          | 128                                                                       | 60    | 37                                                         |                     | 0.2, 0.5, 0.8           |                                                                                       |
| Fruchtman-Steinbok 2021                                                                        | 38                   | one way ANOVA                                                  | 129                                                                       | 61    | N/A                                                        |                     |                         |                                                                                       |
| Leem 2021                                                                                      | 19                   | two sample t test                                              | 128                                                                       | 52    | 19                                                         | 0.9                 | 1.1                     |                                                                                       |
| Schuurmans 2021                                                                                | 77                   | Chi Square                                                     | 145                                                                       | 57    | N/A                                                        |                     |                         |                                                                                       |
| Winkeler 2022                                                                                  | 36                   | ANOVA                                                          | 126                                                                       | 59    | 34                                                         | 0.8                 | 0.25                    |                                                                                       |
| Zhao 2023                                                                                      | 25                   | independent sample t test                                      | 128                                                                       | 52    | N/A                                                        |                     |                         |                                                                                       |
| Fine 2023                                                                                      | 55                   | ANCOVA                                                         | 154                                                                       | 73    | 55                                                         | 0.8                 | 0.16                    | Not Cohen's d but Eta-squared ( $\eta^2$ ); with >0.14 reflecting a large effect size |
|                                                                                                |                      |                                                                |                                                                           |       |                                                            |                     |                         |                                                                                       |
| Average                                                                                        | 36.94                |                                                                | 127.25                                                                    | 56.00 |                                                            |                     |                         |                                                                                       |
| Std dev                                                                                        | 18.01                |                                                                | 15.78                                                                     | 8.41  |                                                            |                     |                         |                                                                                       |
